# Supplementary material
Source: MDPI journal article supplement (https://www.mdpi.com/2076-3417/11/22/11009)
Supplement: s1 [file s1]

**Supplementary Table S1.** Effect of 30Kc19 $\alpha$  on viability and viable cell growth of CHO cells after replacement with serum-free medium. The complete medium was replaced with serum-free DMEM/F12 on Day 3. The table represents the results in Figure 3 ( $n = 3$ ).

|                                                                       |              | none           | 8 $\mu$ M<br>30Kc19 $\alpha$ | 16 $\mu$ M<br>30Kc19 $\alpha$ | 8 $\mu$ M<br>30Kc19 | 16 $\mu$ M<br>30Kc19 |
|-----------------------------------------------------------------------|--------------|----------------|------------------------------|-------------------------------|---------------------|----------------------|
| Viability (%)                                                         | <u>Day 3</u> | 98.8 $\pm$ 0.2 | 98.8 $\pm$ 0.4               | 98.9 $\pm$ 0.7                | 99.4 $\pm$ 0.7      | 99.0 $\pm$ 0.5       |
|                                                                       | <u>Day 4</u> | 87.8 $\pm$ 2.3 | 88.8 $\pm$ 2.9               | 87.1 $\pm$ 1.9                | 86.5 $\pm$ 2.4      | 82.7 $\pm$ 2.2       |
|                                                                       | <u>Day 5</u> | 81.8 $\pm$ 1.3 | 80.9 $\pm$ 4.5               | 83.8 $\pm$ 3.1                | 80.3 $\pm$ 1.0      | 78.4 $\pm$ 1.4       |
|                                                                       | <u>Day 6</u> | 68.1 $\pm$ 3.3 | 63.0 $\pm$ 1.7               | 63.3 $\pm$ 3.8                | 64.2 $\pm$ 2.8      | 54.8 $\pm$ 5.4       |
| Viable cell concentration<br>(10 <sup>4</sup> cells/cm <sup>2</sup> ) | <u>Day 3</u> | 27.1 $\pm$ 1.8 | 27.0 $\pm$ 3.7               | 25.4 $\pm$ 1.6                | 25.0 $\pm$ 1.4      | 26.9 $\pm$ 3.6       |
|                                                                       | <u>Day 4</u> | 31.7 $\pm$ 6.1 | 33.6 $\pm$ 2.6               | 30.8 $\pm$ 1.9                | 32.0 $\pm$ 0.8      | 33.0 $\pm$ 4.7       |
|                                                                       | <u>Day 5</u> | 47.1 $\pm$ 3.4 | 37.5 $\pm$ 6.1               | 37.9 $\pm$ 3.3                | 37.5 $\pm$ 1.7      | 34.9 $\pm$ 4.3       |
|                                                                       | <u>Day 6</u> | 35.2 $\pm$ 8.1 | 30.4 $\pm$ 1.5               | 31.2 $\pm$ 1.8                | 36.7 $\pm$ 3.1      | 28.3 $\pm$ 4.3       |
